# Supplementary material for: Seamless Gene Tagging by Endonuclease-Driven Homologous Recombination
Source: PubMed Central journal article supplement (PMC3161820; doi:10.1371/journal.pone.0023794), 2011-08-22
Supplement: pone.0023794.s001.pdf [file pone.0023794.s001.pdf]

# Supporting Information

for

## Seamless gene tagging by endonuclease-driven homologous recombination

Anton Khmelinskii<sup>1,3,4</sup>, Matthias Meurer<sup>1,3,4</sup>, Nurlanbek Duishoev<sup>1</sup>, Nicolas Delhomme<sup>2</sup> and Michael Knop<sup>1,4,5</sup>

<sup>1</sup> Cell Biology and Biophysics Unit, European Molecular Biology Laboratory (EMBL), Heidelberg, Germany

<sup>2</sup> Genome Biology Unit, European Molecular Biology Laboratory (EMBL), Heidelberg, Germany

<sup>3</sup> these authors contributed equally to this work

<sup>4</sup> present address: Zentrum für Molekulare Biologie der Universität Heidelberg (ZMBH), DKFZ-ZMBH Alliance, University of Heidelberg, Heidelberg, Germany

<sup>5</sup> correspondence to: Michael Knop, m.knop@zmbh.uni-heidelberg.de

### Table of contents

|                                                                                             |           |
|---------------------------------------------------------------------------------------------|-----------|
| <b>1. Supplementary Protocol</b>                                                            | <b>2</b>  |
| Protocol S1                                                                                 | 2         |
| High fidelity PCR amplification of tagging modules.                                         |           |
| <b>2. Supplementary Figures</b>                                                             | <b>3</b>  |
| 2.1. Figure S1                                                                              | 3         |
| Methods for chromosomal gene tagging in <i>S. cerevisiae</i> .                              |           |
| 2.2. Figure S2                                                                              | 5         |
| Alternative routes of DSB repair upon marker excision in the <i>HXT6</i> locus.             |           |
| 2.3. Figure S3                                                                              | 6         |
| High-throughput strain construction by seamless tagging in combination with SGA technology. |           |
| <b>3. Supplementary Tables</b>                                                              | <b>7</b>  |
| 3.1. Table S1                                                                               | 7         |
| Plasmids.                                                                                   |           |
| 3.2. Table S2                                                                               | 8         |
| Yeast strains.                                                                              |           |
| 3.3. Table S3                                                                               | 9         |
| Oligonucleotides.                                                                           |           |
| 3.4. Table S4                                                                               | 10        |
| ORFs with potential for ectopic module excision during seamless N-terminal tagging.         |           |
| 3.5. Table S5                                                                               | 13        |
| ORFs with potential for ectopic module excision during seamless C-terminal tagging.         |           |
| <b>4. Supplementary References</b>                                                          | <b>16</b> |

## 1. Supplementary Protocol

### Protocol S1. High fidelity PCR amplification of tagging modules.

PCR amplification of the modules for seamless tagging is challenging due to the presence of the tandem repeat of the tag sequence. We routinely use the Herculase II Fusion DNA polymerase (Stratagene) with an amplification protocol extensively optimized by varying  $MgCl_2$  concentration, DMSO concentration, annealing temperature, elongation time and by including betaine.

| Reaction composition                 |               | PCR program           |             |
|--------------------------------------|---------------|-----------------------|-------------|
| 5x Herculase II Reaction Buffer      | 10 $\mu$ l    | 1) 95°C               | 2 min       |
| dNTPs (100 mM stock)                 | 0.5 $\mu$ l   | 2) 95°C               | 20 s        |
| $MgCl_2$ (50 mM stock)               | 1.5 $\mu$ l   | 3) 64°C               | 20 s        |
| betaine (5M stock)                   | 5.0 $\mu$ l   | 4) 72°C               | 40 s per kb |
| template DNA (200 ng/ $\mu$ l stock) | 0.5 $\mu$ l   | 5) return to 2) (x29) |             |
| H <sub>2</sub> O                     | 29.75 $\mu$ l | 6) 72°C               | 3 min       |
| Herculase II                         | 0.25 $\mu$ l  | 7) 4°C                |             |
| primer mix (10 $\mu$ M each)         | 2.5 $\mu$ l   |                       |             |
| -----                                |               |                       |             |
| total volume                         | 50 $\mu$ l    |                       |             |

## 2. Supplementary Figures

### 2.1. Figure S1

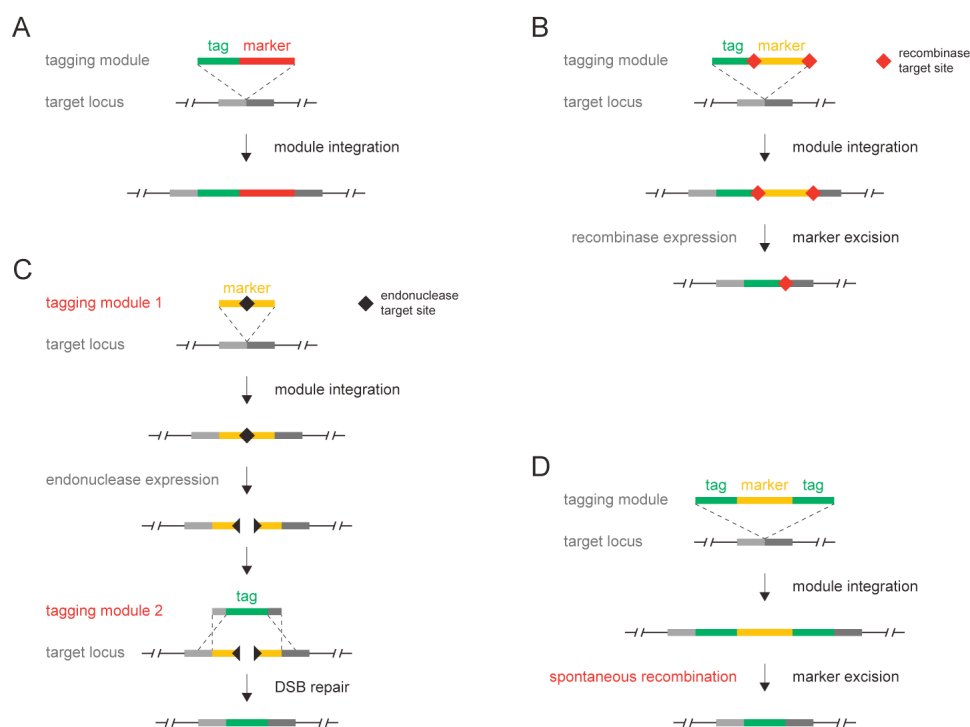

**Figure S1.** Methods for chromosomal gene tagging in *S. cerevisiae*.

(A-D) Schematic representation of the key steps of different gene tagging methods. Methods (A) and (B) permit gene tagging in a single round of selection-validation, but introduce foreign sequences associated with the tag (red elements). Methods (C) and (D) permit seamless gene tagging, but require two rounds of selection-validation (red descriptions).

(A) *Genome manipulation without marker excision* – Using PCR-targeting, the tag is introduced into the locus of interest together with a selection marker[1,2]. The presence of the marker (with its promoter and terminator) in the genome disrupts expression of the tagged gene. For C-terminal protein tagging, a heterologous terminator (not depicted in the figure) is therefore placed in the tagging module between the tag and the selection marker. Using this approach, valuable genome-wide resources for systematic protein complex purification and protein localization have been generated in yeast[3-6]. However, use of a heterologous terminator (and thus heterologous 3'UTR) can affect endogenous gene expression by changing mRNA abundance, stability or localization[7]. Moreover, a heterologous terminator can disrupt transcription of non-coding RNAs (Figure 4C), which are ubiquitous in the yeast genome[8-10].

(B) *Recombinase-driven marker excision* – A recombination system, such as the Cre-lox system[11], can be used for excision of auxiliary sequences after tagging. All sequences to be removed (e.g. the selection marker) are flanked by specific recombinease target sites. After module integration into the locus of interest, marker excision is achieved by expression of the recombinease[12]. However, one recombinease target site always remains in the genome and might affect gene expression.

(C) *Genome manipulation with 'delitto perfetto'* – Seamless genome manipulations, such as tag insertion, are possible with the 'delitto perfetto' approach[13]. In this two-step procedure, the target locus is first marked with a counter-selectable marker and an endonuclease target site using PCR-targeting. Following endonuclease expression, the strain is transformed with a second DNA fragment containing the tag.

This fragment serves as a template for the cell to repair the DSB by homologous recombination. Clones with seamlessly tagged loci can then be identified by counter selection for the marker. However, the requirement of two rounds of transformation is incompatible with high-throughput strain construction.

**(D) Spontaneous marker excision** – Modules with a counter-selectable marker placed between two copies of the tag sequence can be used for seamless gene tagging. However, tagging of essential genes is not possible with described tag-marker-tag protein tagging modules (no heterologous terminator or promoter was used in the modules for expression of C- or N-terminally tagged proteins prior to marker excision, respectively)[14]. Moreover, in this system marker excision relies on spontaneous recombination between the repeats, which competes with marker inactivation by spontaneous mutations. As correct marker excision occurs only in a fraction of clones, that must be identified individually[14], this approach is incompatible with high-throughput strain construction.

## 2.2. Figure S2

A

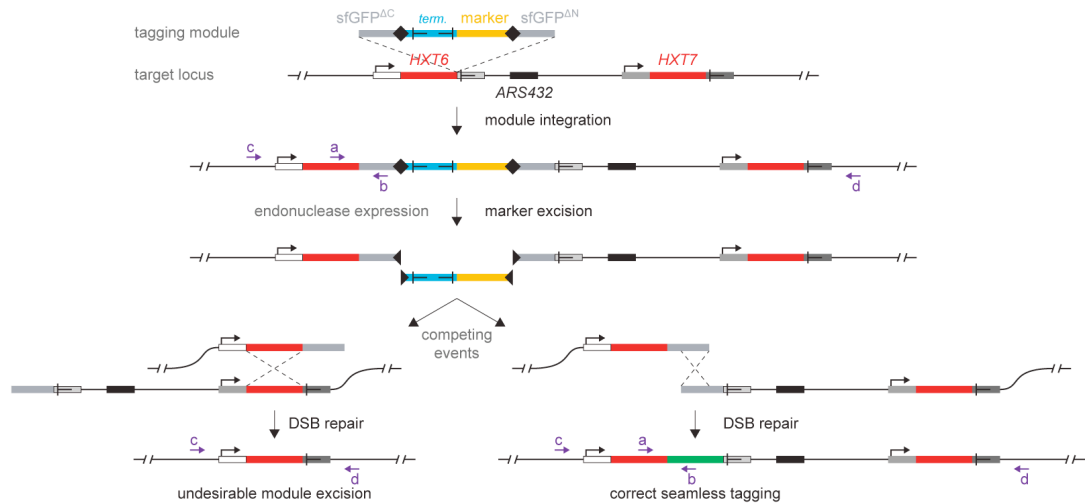

B

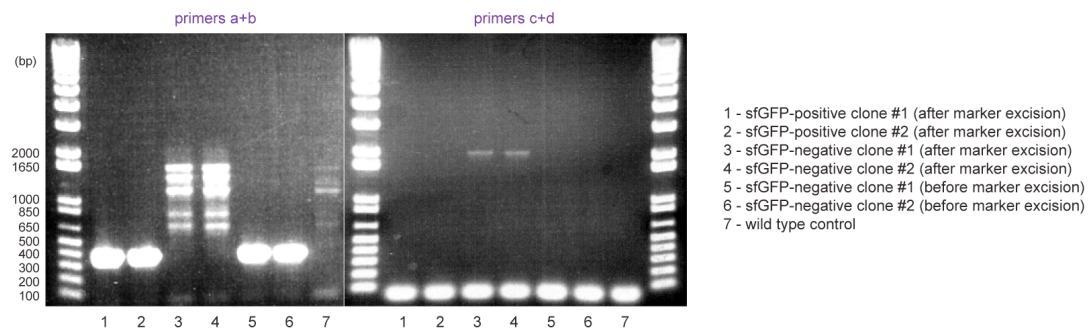

**Figure S2.** Alternative routes of DSB repair upon marker excision in the *HXT6* locus.

(A) Schematic representation of the *HXT6* locus tagged with a module for seamless C-terminal protein tagging with sfGFP (Figure 1B-i). No essential genetic elements are found between the *HXT6* and *HXT7* genes. The annealing sites of four primers (a, b, c, d; Table S3) used to determine the outcome of DSB repair are indicated in purple on the tagged locus (before marker excision) and on the alternative products of DSB repair (after marker excision).

(B) PCR analysis of alternative products of DSB repair from (A). Using primers a+b, a PCR product of ~350 bp is expected for sfGFP-positive clones, which underwent correct seamless marker excision. No PCR product is expected for sfGFP-negative clones that repaired the DSB by homologous recombination between the *HXT6* and *HXT7* ORFs. The pattern of bands obtained with primers a+b in lanes 3, 4 and 7 likely results from unspecific primer binding and long elongation time used for PCR. With primers c+d, a PCR product of ~2100 bp is expected for sfGFP-negative clones. A PCR product of more than 8200 bp is expected for the sfGFP-positive clones.

### 2.3. Figure S3

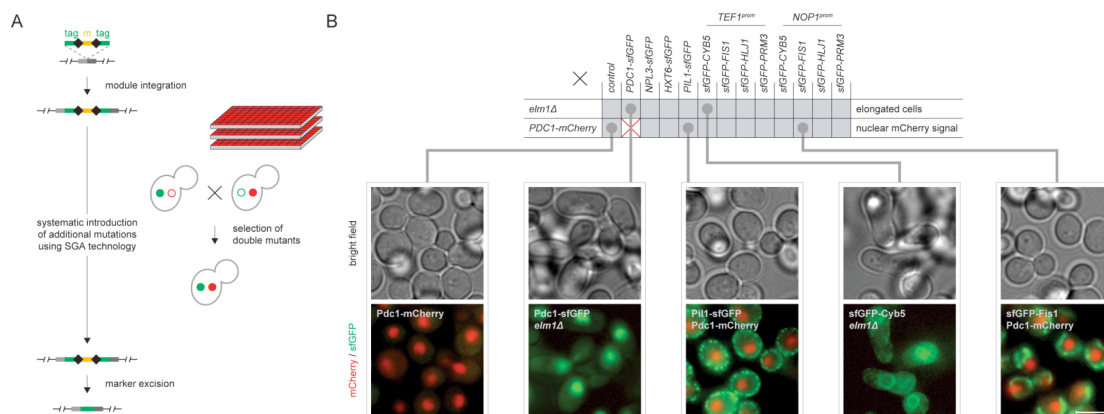

**Figure S3.** High-throughput strain construction by seamless tagging in combination with SGA technology.

**(A)** Workflow for high-throughput strain construction with seamless tagging. Prior to seamless marker excision, strains with validated integration of a tagging module (full green circle) are crossed to arrays of strains carrying additional genome alterations (gene deletions or other tagged loci, full red circles). Haploid strains carrying both genome manipulations are then selected using SGA methodology. Finally, the obtained strains undergo seamless marker excision.

**(B)** Strains expressing C-terminal (Figure 2A) or N-terminal (Figure 4A) protein fusions to sfGFP and the control strain YMaM343 (Table S2) were used to demonstrate that seamless tagging can be combined with SGA technology. Prior to seamless marker excision in the tagged loci, this set of strains (generated in the SGA entry strain YST288 containing a *natNT2*-marked *GAL1-I-SCEI* construct in the genome, strain YND50 in Table S2) was crossed to *elm1Δ* (elongated cell shape) or *PDC1-mCherry* (red-fluorescent nuclei) cells. The resulting diploids were sporulated and haploids carrying simultaneously three markers (for the tagged ORF, the *I-SCEI* construct and the *elm1Δ* or the *PDC1-mCherry* allele) were selected using standard SGA protocols. All possible twenty-five strains were effectively obtained (marked in grey); generation of the strain marked with a red cross is not possible and served as a negative control. All strains then underwent marker excision by sequential growth on galactose and 5-FOA plates (Figure 2A). Successful seamless marker excision was confirmed in all strains by fluorescence microscopy. Representative bright field and fluorescence microscopy images are shown for five of the final strains after seamless marker excision. Scale bar is 5 μm.

### 3. Supplementary Tables

#### 3.1. Table S1. Plasmids.

| Plasmid     | Backbone | Description                                                                                      | Source     | Use                |
|-------------|----------|--------------------------------------------------------------------------------------------------|------------|--------------------|
| pFA6a       |          | <i>E. coli</i> plasmid containing the ampicillin resistance gene <i>ampR</i>                     | [15]       |                    |
| pRS305N     |          | Vector for single integration via disruption of the <i>LEU2</i> locus, nourseothricin resistance | [16]       |                    |
| pND32       | pRS305N  | pRS305N-GAL1pr-I-SCEI                                                                            | this study |                    |
| pFA6a-KanMX | pFA6a    | pFA6a-KanMX                                                                                      | [15]       | gene deletion      |
| pMM151      | pFA6a    | pFA6a-mCherry-ADH1term-KanMX                                                                     | this study | C-terminal tagging |
| pMaM172     | pFA6a    | pYM-N-mCherryΔC-I-SceI <sup>site</sup> -CYC1term-URA3-TEF1pr-I-SceI <sup>site</sup> -mCherry     | this study | N-terminal tagging |
| pMaM173     | pFA6a    | pYM-N-sfGFPΔC-I-SceI <sup>site</sup> -CYC1term-URA3-TEF1pr-I-SceI <sup>site</sup> -sfGFP         | this study | N-terminal tagging |
| pMaM188     | pFA6a    | pYM-N-mCherryΔC-I-SceI <sup>site</sup> -CYC1term-URA3-NOP1pr-I-SceI <sup>site</sup> -mCherry     | this study | N-terminal tagging |
| pMaM189     | pFA6a    | pYM-N-sfGFPΔC-I-SceI <sup>site</sup> -CYC1term-URA3-NOP1pr-I-SceI <sup>site</sup> -sfGFP         | this study | N-terminal tagging |
| pMaM174     | pFA6a    | pFA6a-mCherry-I-SceI <sup>site</sup> -CYC1term-URA3-I-SceI <sup>site</sup> -mCherryΔN            | this study | C-terminal tagging |
| pMaM175     | pFA6a    | pFA6a-sfGFP-I-SceI <sup>site</sup> -CYC1term-URA3-I-SceI <sup>site</sup> -sfGFPΔN                | this study | C-terminal tagging |
| pMaM177     | pFA6a    | pFA6a-sfGFPΔC-I-SceI <sup>site</sup> -CYC1term-URA3-I-SceI <sup>site</sup> -sfGFPΔN              | this study | C-terminal tagging |

### 3.2. Table S2. Yeast strains.

| Strain  | Background | Description                                                                                                                           | Source     | Figure         |
|---------|------------|---------------------------------------------------------------------------------------------------------------------------------------|------------|----------------|
| BY4741  | S288C      | MAT $\alpha$ ura3 $\Delta$ 0 leu2 $\Delta$ 0 his3 $\Delta$ 1 lys2 $\Delta$ 0                                                          | [17]       |                |
| BY4742  | S288C      | MAT $\alpha$ ura3 $\Delta$ 0 leu2 $\Delta$ 0 his3 $\Delta$ 1 lys2 $\Delta$ 0                                                          | [17]       |                |
| Y8205   | BY4742     | MAT $\alpha$ can1 $\Delta$ ::STE2pr-his5 lyp1 $\Delta$ ::STE3pr-LEU2 ura3 $\Delta$ 0 leu2 $\Delta$ 0 his3 $\Delta$ 1 met15 $\Delta$ 0 | [17]       |                |
| YST288  | BY4741     | MAT $\alpha$ can1 $\Delta$ ::STE2pr-his5 lyp1 $\Delta$ ::STE3pr-LEU2 ura3 $\Delta$ 0 leu2 $\Delta$ 0 his3 $\Delta$ 1 met15 $\Delta$ 0 | this study | 2A             |
| YND50   | YST288     | leu2 $\Delta$ 0::NatNT2-GAL1pr-I-SCEI                                                                                                 | this study | 2A             |
| YMaM330 | Y8205      | leu2 $\Delta$ 0::NatNT2-GAL1pr-I-SCEI                                                                                                 | this study |                |
| YMaM343 | YND50      | ura3 $\Delta$ 0::mCherry $\Delta$ N-CYC1term-URA3-mCherry $\Delta$ N (positive excision control)                                      | this study | 2A, S3         |
| YMaM345 | YND50      | NPL3-sfGFP $\Delta$ C-CYC1term-URA3-sfGFP $\Delta$ N                                                                                  | this study | 2A, 2C, S3     |
| YMaM305 | YND50      | PDC1-sfGFP $\Delta$ C-CYC1term-URA3-sfGFP $\Delta$ N                                                                                  | this study | 2A-C, S3       |
| YMaM307 | YND50      | PIL1-sfGFP $\Delta$ C-CYC1term-URA3-sfGFP $\Delta$ N                                                                                  | this study | 2A, 2C, S3     |
| YMaM308 | YND50      | HXT6-sfGFP $\Delta$ C-CYC1term-URA3-sfGFP $\Delta$ N                                                                                  | this study | 2A, 2C, S2, S3 |
| YMaM336 | YST288     | NPL3-sfGFP $\Delta$ C-CYC1term-URA3-sfGFP $\Delta$ N                                                                                  | this study | 2A             |
| YMaM337 | YST288     | PDC1-sfGFP $\Delta$ C-CYC1term-URA3-sfGFP $\Delta$ N                                                                                  | this study | 2A             |
| YMaM338 | YST288     | PIL1-sfGFP $\Delta$ C-CYC1term-URA3-sfGFP $\Delta$ N                                                                                  | this study | 2A             |
| YMaM339 | YST288     | HXT6-sfGFP $\Delta$ C-CYC1term-URA3-sfGFP $\Delta$ N                                                                                  | this study | 2A             |
| YMaM346 | YND50      | IME4-sfGFP-CYC1term-URA3-sfGFP $\Delta$ N                                                                                             | this study | 4C             |
| YMaM319 | YND50      | sfGFP $\Delta$ C-URA3-NOP1pr-sfGFP-CYB5                                                                                               | this study | 4A, 4B, S3     |
| YMaM320 | YND50      | sfGFP $\Delta$ C-URA3-NOP1pr-sfGFP-FIS1                                                                                               | this study | 4A, 4B, S3     |
| YMaM321 | YND50      | sfGFP $\Delta$ C-URA3-NOP1pr-sfGFP-HLJ1                                                                                               | this study | 4A, 4B, S3     |
| YMaM322 | YND50      | sfGFP $\Delta$ C-URA3-NOP1pr-sfGFP-PRM3                                                                                               | this study | 4A, 4B, S3     |
| YMaM323 | YND50      | sfGFP $\Delta$ C-URA3-TEF1pr-sfGFP-CYB5                                                                                               | this study | 4A, 4B, S3     |
| YMaM324 | YND50      | sfGFP $\Delta$ C-URA3-TEF1pr-sfGFP-FIS1                                                                                               | this study | 4A, 4B, S3     |
| YMaM325 | YND50      | sfGFP $\Delta$ C-URA3-TEF1pr-sfGFP-HLJ1                                                                                               | this study | 4A, 4B, S3     |
| YMaM326 | YND50      | sfGFP $\Delta$ C-URA3-TEF1pr-sfGFP-PRM3                                                                                               | this study | 4A, 4B, S3     |
| YMaM341 | BY4742     | elm1 $\Delta$ ::KanMX                                                                                                                 | this study | S3             |
| YMaM342 | BY4742     | PDC1-mCherry-KanMX                                                                                                                    | this study | S3             |



### 3.3. Table S3. Oligonucleotides.

| Oligonucleotide | Sequence                                                                | Application                                 |
|-----------------|-------------------------------------------------------------------------|---------------------------------------------|
| a               | CTGGTGCTATTAAGTTCTACTACG                                                | colony PCR ( <a href="#">Figure S2</a> )    |
| b               | CAATTTACCATTGGTGGCATCG                                                  | colony PCR ( <a href="#">Figure S2</a> )    |
| c               | GACAATGGAGAGCAAATGG                                                     | colony PCR ( <a href="#">Figure S2</a> )    |
| d               | AAGTTTCTTTGTCTCCGTCC                                                    | colony PCR ( <a href="#">Figure S2</a> )    |
| ISce1-Nat-A     | TCAAAAAGATCCATGTATAATCTTCATTATTACAGCCCTCTTGACTTATTTTCAGGAAAGTTTCGGAGGAG | NatNT2-GAL1pr-I-SCEI integration into leu2Δ |
| ISce1-Nat-B     | GTTTCGTCTACCCTATGAACATATTCCATTTTGTAAATTCGTGTCGCAAGAATTTTCGTTTTAAACCTAAG | NatNT2-GAL1pr-I-SCEI integration into leu2Δ |

### 3.4. Table S4. ORFs with potential for ectopic module excision during seamless N-terminal tagging.

ORFs with the start codon flanked by similar stretches longer than 28 bp (Figure 3C) are listed, ordered by the length of the longest uninterrupted stretch of sequence identity within the similar stretches. For each ORF, the *Saccharomyces* genome database ID (SGDID), the systematic name, the standard name, the length of the flanking similar stretches and the length of the flanking identical stretches are indicated.

| SGDID      | Systematic name | Standard name | Similar stretch/bp | Identical stretch/bp | SGDID      | Systematic name | Standard name | Similar stretch/bp | Identical stretch/bp |
|------------|-----------------|---------------|--------------------|----------------------|------------|-----------------|---------------|--------------------|----------------------|
| S000028561 | YLR154C-G       |               | 6258               | 6258                 | S000028813 | YAL063C-A       |               | 901                | 225                  |
| S000028672 | YLL066W-B       |               | 5473               | 3693                 | S000002141 | YAL064W-B       |               | 396                | 225                  |
| S000028566 | YLR159C-A       |               | 3637               | 3623                 | S000001817 | YAL065C         |               | 302                | 208                  |
| S000028686 | YLR466C-B       |               | 6302               | 3340                 | S000004454 | YLR462W         |               | 805                | 189                  |
| S000004459 | YLR467W         | YRF1-5        | 5559               | 3340                 | S000028857 | YOR192C-C       |               | 161                | 161                  |
| S000028422 | YLR154W-C       | TAR1          | 3278               | 3278                 | S000002751 | YDR343C         | HXT6          | 1500               | 149                  |
| S000028678 | YLR157W-E       |               | 7163               | 3244                 | S000001085 | YHR043C         | DOG2          | 623                | 148                  |
| S000028677 | YLR157W-D       |               | 6953               | 3244                 | S000028650 | YHR212W-A       |               | 568                | 121                  |
| S000004147 | YLR157C         | ASP3-2        | 5247               | 3244                 | S000001256 | YHR213W         |               | 515                | 121                  |
| S000028564 | YLR156C-A       |               | 3800               | 3244                 | S000001136 | YHR094C         | HXT1          | 605                | 119                  |
| S000004146 | YLR156W         |               | 3302               | 3244                 | S000007549 | YCL021W-A       |               | 310                | 117                  |
| S000028565 | YLR157C-C       |               | 7015               | 3096                 | S000000617 | YCR023C         |               | 312                | 109                  |
| S000002445 | YDR038C         | ENA5          | 3227               | 2643                 | S000028818 | YCR024C-B       |               | 312                | 109                  |
| S000003990 | YLL067C         |               | 4170               | 2390                 | S000000615 | YCR021C         | HSP30         | 312                | 109                  |
| S000004148 | YLR158C         | ASP3-3        | 5568               | 2364                 | S000006439 | YCR020W-B       | HTL1          | 312                | 109                  |
| S000004149 | YLR159W         |               | 3861               | 2307                 | S000000614 | YCR020C-A       | MAK31         | 312                | 109                  |
| S000004150 | YLR160C         | ASP3-4        | 2190               | 2176                 | S000000612 | YCR019W         | MAK32         | 312                | 109                  |
| S000002446 | YDR039C         | ENA2          | 3864               | 1986                 | S000000621 | YCR026C         | NPP1          | 312                | 109                  |
| S000001096 | YHR054C         |               | 1984               | 1984                 | S000000613 | YCR020C         | PET18         | 312                | 109                  |
| S000002750 | YDR342C         | HXT7          | 1799               | 1631                 | S000000619 | YCR024C-A       | PMP1          | 312                | 109                  |
| S000004145 | YLR155C         | ASP3-1        | 1595               | 1595                 | S000000622 | YCR027C         | RHB1          | 312                | 109                  |
| S000001097 | YHR055C         | CUP1-2        | 1533               | 1533                 | S000000618 | YCR024C         | SLM5          | 312                | 109                  |
| S000003989 | YLL066C         |               | 1423               | 1387                 | S000000296 | YBR092C         | PHO3          | 1384               | 98                   |
| S000028562 | YLR154C-H       |               | 790                | 526                  | S000003536 | YIL014C-A       |               | 85                 | 81                   |
| S000004151 | YLR161W         |               | 790                | 526                  | S000001272 | YIL010W         | DOT5          | 85                 | 81                   |
| S000004152 | YLR162W         |               | 790                | 526                  | S000006432 | YIL009C-A       | EST3          | 85                 | 81                   |
| S000001095 | YHR053C         | CUP1-1        | 455                | 455                  | S000001276 | YIL014W         | MNT3          | 85                 | 81                   |
| S000004779 | YMR169C         | ALD3          | 1449               | 329                  | S000001275 | YIL013C         | PDR11         | 85                 | 81                   |
| S000004458 | YLR466W         | YRF1-4        | 1936               | 261                  | S000001273 | YIL011W         | TIR3          | 85                 | 81                   |
| S000004456 | YLR464W         |               | 1409               | 261                  | S000002958 | YER060W-A       | FCY22         | 269                | 78                   |
| S000002140 | YAL064C-A       |               | 901                | 225                  | S000001134 | YHR092C         | HXT4          | 614                | 62                   |
| S000000060 | YAL064W         |               | 901                | 225                  | S000006325 | YPR121W         | THI22         | 403                | 60                   |

|            |           |        |     |    |            |           |       |     |    |
|------------|-----------|--------|-----|----|------------|-----------|-------|-----|----|
| S000028567 | YLR162W-A | RRT15  | 137 | 55 | S000028829 | YHL048C-A |       | 46  | 19 |
| S000004608 | YMR006C   | PLB2   | 192 | 50 | S000001040 | YHL048W   | COS8  | 46  | 19 |
| S000000075 | YAR027W   | UIP3   | 67  | 42 | S000028580 | YOL164W-A |       | 45  | 19 |
| S000000076 | YAR028W   |        | 162 | 37 | S000005523 | YOL163W   |       | 45  | 19 |
| S000003375 | YGR143W   | SKN1   | 102 | 34 | S000005522 | YOL162W   |       | 45  | 19 |
| S000005086 | YNL142W   | MEP2   | 34  | 34 | S000007627 | YOL159C-A |       | 45  | 19 |
| S000001696 | YKL213C   | DOA1   | 31  | 31 | S000005519 | YOL159C   |       | 45  | 19 |
| S000001698 | YKL215C   | OXF1   | 31  | 31 | S000005524 | YOL164W   | BDS1  | 45  | 19 |
| S000001695 | YKL212W   | SAC1   | 31  | 31 | S000005521 | YOL161C   | PAU20 | 45  | 19 |
| S000001697 | YKL214C   | YRA2   | 31  | 31 | S000003357 | YGR125W   |       | 30  | 19 |
| S000003019 | YGL051W   | MST27  | 182 | 30 | S000003358 | YGR126W   |       | 30  | 19 |
| S000002197 | YDL039C   | PRM7   | 89  | 30 | S000004294 | YLR303W   | MET17 | 93  | 18 |
| S000001261 | YHR218W   |        | 133 | 29 | S000003750 | YJL214W   | HXT8  | 89  | 18 |
| S000001262 | YHR219W   |        | 133 | 29 | S000003752 | YJL216C   | IMA5  | 89  | 18 |
| S000001647 | YKL164C   | PIR1   | 73  | 28 | S000003021 | YGL053W   | PRM8  | 64  | 18 |
| S000001646 | YKL163W   | PIR3   | 73  | 28 | S000028525 | YLR307C-A |       | 190 | 17 |
| S000001747 | YKR039W   | GAP1   | 219 | 27 | S000004299 | YLR308W   | CDA2  | 190 | 17 |
| S000005871 | YOR344C   | TYE7   | 69  | 26 | S000005756 | YOR230W   | WTM1  | 71  | 17 |
| S000000609 | YCR016W   |        | 151 | 25 | S000002400 | YDL241W   |       | 32  | 17 |
| S000000610 | YCR017C   | CWH43  | 151 | 25 | S000002398 | YDL239C   | ADY3  | 32  | 17 |
| S000000611 | YCR018C   | SRD1   | 151 | 25 | S000002396 | YDL237W   | AIM6  | 32  | 17 |
| S000003816 | YJR055W   | HIT1   | 100 | 25 | S000002397 | YDL238C   | GUD1  | 32  | 17 |
| S000000084 | YAR050W   | FLO1   | 54  | 25 | S000002399 | YDL240W   | LRG1  | 32  | 17 |
| S000003171 | YGL203C   | KEX1   | 139 | 24 | S000002395 | YDL236W   | PHO13 | 32  | 17 |
| S000004344 | YLR352W   |        | 34  | 24 | S000000077 | YAR029W   |       | 120 | 16 |
| S000004345 | YLR353W   | BUD8   | 34  | 24 | S000000078 | YAR031W   | PRM9  | 120 | 16 |
| S000004343 | YLR351C   | NIT3   | 34  | 24 | S000000936 | YER134C   |       | 55  | 16 |
| S000004346 | YLR354C   | TAL1   | 34  | 24 | S000000217 | YBR013C   |       | 36  | 16 |
| S000001554 | YKL071W   |        | 83  | 23 | S000002447 | YDR040C   | ENA1  | 34  | 15 |
| S000001553 | YKL070W   |        | 83  | 23 | S000003877 | YJR116W   |       | 33  | 15 |
| S000001552 | YKL069W   |        | 83  | 23 | S000003965 | YLL042C   | ATG10 | 29  | 15 |
| S000028524 | YKL068W-A |        | 83  | 23 | S000003966 | YLL043W   | FPS1  | 29  | 15 |
| S000001551 | YKL068W   | NUP100 | 83  | 23 | S000003964 | YLL041C   | SDH2  | 29  | 15 |
| S000004003 | YLR013W   | GAT3   | 30  | 23 | S000003963 | YLL040C   | VPS13 | 29  | 15 |
| S000004602 | YML133C   |        | 34  | 22 | S000003754 | YJL218W   |       | 145 | 14 |
| S000003462 | YGR230W   | BNS1   | 33  | 22 | S000003755 | YJL219W   | HXT9  | 145 | 14 |
| S000003464 | YGR232W   | NAS6   | 33  | 22 | S000003757 | YJL221C   | IMA4  | 145 | 14 |
| S000003463 | YGR231C   | PHB2   | 33  | 22 | S000003753 | YJL217W   | REE1  | 145 | 14 |
| S000003465 | YGR233C   | PHO81  | 33  | 22 | S000001908 | YFR012W   |       | 43  | 14 |
| S000003461 | YGR229C   | SMI1   | 33  | 22 | S000007606 | YFR012W-A |       | 43  | 14 |
| S000000079 | YAR033W   | MST28  | 138 | 21 | S000001912 | YFR016C   |       | 43  | 14 |
| S000006217 | YPR013C   |        | 100 | 21 | S000001913 | YFR017C   |       | 43  | 14 |
| S000003817 | YJR056C   |        | 81  | 20 | S000001914 | YFR018C   |       | 43  | 14 |
| S000000272 | YBR068C   | BAP2   | 68  | 20 | S000001907 | YFR011C   | AIM13 | 43  | 14 |
| S000001382 | YIL120W   | QDR1   | 67  | 20 | S000001917 | YFR021W   | ATG18 | 43  | 14 |
| S000005056 | YNL112W   | DBP2   | 40  | 20 | S000001910 | YFR014C   | CMK1  | 43  | 14 |
|            |           |        |     |    | S000001915 | YFR019W   | FAB1  | 43  | 14 |

|             |           |        |    |    |             |           |        |    |    |
|-------------|-----------|--------|----|----|-------------|-----------|--------|----|----|
| S000001905  | YFR009W   | GCN20  | 43 | 14 | S000001876  | YFL018C   | LPD1   | 35 | 11 |
| S000001911  | YFR015C   | GSY1   | 43 | 14 | S000003636  | YJL100W   | LSB6   | 35 | 11 |
| S000001921  | YFR025C   | HIS2   | 43 | 14 | S000001874  | YFL020C   | PAU5   | 35 | 11 |
| S000001909  | YFR013W   | IOC3   | 43 | 14 | S000001120  | YHR078W   |        | 30 | 11 |
| S000002968  | YFR024C-A | LSB3   | 43 | 14 | S000001121  | YHR079C   | IRE1   | 30 | 11 |
| S000001919  | YFR023W   | PES4   | 43 | 14 | S000001119  | YHR077C   | NMD2   | 30 | 11 |
| S000001918  | YFR022W   | ROG3   | 43 | 14 | S000004325  | YLR333C   | RPS25B | 30 | 11 |
| S000001906  | YFR010W   | UBP6   | 43 | 14 | S000001957  | YHR079C-A | SAE3   | 30 | 11 |
| S000006207  | YPR003C   |        | 37 | 14 | S000005963  | YPL042C   | SSN3   | 29 | 11 |
| S000006208  | YPR004C   | AIM45  | 37 | 14 | S000001897  | YFR001W   | LOC1   | 31 | 10 |
| S000006209  | YPR005C   | HAL1   | 37 | 14 | S000001247  | YHR204W   | MNL1   | 31 | 10 |
| S000006210  | YPR006C   | ICL2   | 37 | 14 | S000001898  | YFR002W   | NIC96  | 31 | 10 |
| S000006211  | YPR007C   | REC8   | 37 | 14 | S000001246  | YHR203C   | RPS4B  | 31 | 10 |
| S000001904  | YFR008W   | FAR7   | 44 | 13 | S000000483  | YBR279W   | PAF1   | 29 | 10 |
| S000001922  | YFR026C   | ULI1   | 44 | 13 | S000000567  | YOR131C   |        | 88 | 9  |
| S000001903  | YFR007W   | YFH7   | 44 | 13 | S0000005667 | YOR141C   | ARP8   | 88 | 9  |
| S000001036  | YHL044W   |        | 37 | 13 | S0000005660 | YOR134W   | BAG7   | 88 | 9  |
| S000001034  | YHL042W   |        | 37 | 13 | S0000005659 | YOR133W   | EFT1   | 88 | 9  |
| S000001039  | YHL047C   | ARN2   | 37 | 13 | S0000005662 | YOR136W   | IDH2   | 88 | 9  |
| S000001035  | YHL043W   | ECM34  | 37 | 13 | S0000005668 | YOR142W   | LSC1   | 88 | 9  |
| S000001038  | YHL046C   | PAU13  | 37 | 13 | S0000005664 | YOR138C   | RUP1   | 88 | 9  |
| S000004705  | YMR099C   |        | 36 | 13 | S0000005666 | YOR140W   | SFL1   | 88 | 9  |
| S000004708  | YMR102C   |        | 36 | 13 | S0000005663 | YOR137C   | SIA1   | 88 | 9  |
| S0000028692 | YMR105W-A |        | 36 | 13 | S0000005658 | YOR132W   | VPS17  | 88 | 9  |
| S000004706  | YMR100W   | MUB1   | 36 | 13 | S000004303  | YLR312C   |        | 29 | 9  |
| S000004711  | YMR105C   | PGM2   | 36 | 13 | S000004301  | YLR310C   | CDC25  | 29 | 9  |
| S000004707  | YMR101C   | SRT1   | 36 | 13 | S000004304  | YLR312W-A | MRPL15 | 29 | 9  |
| S000004712  | YMR106C   | YKU80  | 36 | 13 | S000004110  | YLR120C   | YPS1   | 44 | 8  |
| S000004710  | YMR104C   | YPK2   | 36 | 13 | S000003183  | YGL215W   | CLG1   | 34 | 8  |
| S000000177  | YBL081W   |        | 34 | 13 | S000003190  | YGL222C   | EDC1   | 34 | 8  |
| S000000178  | YBL082C   | ALG3   | 34 | 13 | S000003188  | YGL220W   | FRA2   | 34 | 8  |
| S000000180  | YBL084C   | CDC27  | 34 | 13 | S000003184  | YGL216W   | KIP3   | 34 | 8  |
| S000000778  | YEL052W   | AFG1   | 33 | 13 | S000003187  | YGL219C   | MDM34  | 34 | 8  |
| S000000779  | YEL053C   | MAK10  | 33 | 13 | S000003189  | YGL221C   | NIF3   | 34 | 8  |
| S000000780  | YEL054C   | RPL12A | 33 | 13 | S000028573  | YML054C-A |        | 30 | 8  |
| S000000777  | YEL051W   | VMA8   | 33 | 13 | S000004517  | YML053C   |        | 30 | 8  |
| S000002251  | YDL093W   | PMT5   | 74 | 12 | S000004514  | YML050W   | AIM32  | 30 | 8  |
| S000113557  | YDL007C-A |        | 55 | 12 | S000004521  | YML057W   | CMP2   | 30 | 8  |
| S000003094  | YGL126W   | SCS3   | 42 | 12 | S000004518  | YML054C   | CYB2   | 30 | 8  |
| S000003095  | YGL127C   | SOH1   | 42 | 12 | S000004515  | YML051W   | GAL80  | 30 | 8  |
| S000003696  | YJL160C   |        | 89 | 11 | S000007472  | YML058W-A | HUG1   | 30 | 8  |
| S000003695  | YJL159W   | HSP150 | 89 | 11 | S000004520  | YML056C   | IMD4   | 30 | 8  |
| S000003911  | YJR150C   | DAN1   | 68 | 11 | S000004524  | YML059C   | NTE1   | 30 | 8  |
| S000001579  | YKL096W   | CWP1   | 58 | 11 | S000004523  | YML058W   | SML1   | 30 | 8  |
| S000004646  | YMR043W   | MCM1   | 42 | 11 | S000004516  | YML052W   | SUR7   | 30 | 8  |
| S000001873  | YFL021W   | GAT1   | 35 | 11 | S000007548  | YCL026C-B | HBN1   | 30 | 7  |
| S000003637  | YJL101C   | GSH1   | 35 | 11 |             |           |        |    |    |

### 3.5. Table S5. ORFs with potential for ectopic module excision during seamless C-terminal tagging.

ORFs with the stop codon flanked by similar stretches longer than 28 bp (Figure 3C) are listed, ordered by the length of the longest uninterrupted stretch of sequence identity within the similar stretches. For each ORF, the *Saccharomyces* genome database ID (SGDID), the systematic name, the standard name, the length of the flanking similar stretches and the length of the flanking identical stretches are indicated.

| SGDID      | Systematic name | Standard name | Similar stretch/bp | Identical stretch/bp | SGDID      | Systematic name | Standard name | Similar stretch/bp | Identical stretch/bp |
|------------|-----------------|---------------|--------------------|----------------------|------------|-----------------|---------------|--------------------|----------------------|
| S000028561 | YLR154C-G       |               | 6408               | 6408                 | S000002140 | YAL064C-A       |               | 901                | 225                  |
| S000028672 | YLL066W-B       |               | 5482               | 3777                 | S000000060 | YAL064W         |               | 901                | 225                  |
| S000003989 | YLL066C         |               | 5146               | 3777                 | S000028813 | YAL063C-A       |               | 901                | 225                  |
| S000028422 | YLR154W-C       | TAR1          | 3653               | 3653                 | S000000059 | YAL063C         | FLO9          | 901                | 225                  |
| S000028686 | YLR466C-B       |               | 6364               | 3340                 | S000002141 | YAL064W-B       |               | 777                | 225                  |
| S000004150 | YLR160C         | ASP3-4        | 3279               | 3265                 | S000002774 | YDR366C         |               | 184                | 174                  |
| S000002446 | YDR039C         | ENA2          | 3836               | 3252                 | S000002753 | YDR345C         | HXT3          | 1497               | 149                  |
| S000028677 | YLR157W-D       |               | 7163               | 3244                 | S000001086 | YHR044C         | DOG1          | 623                | 148                  |
| S000028678 | YLR157W-E       |               | 7163               | 3244                 | S000028650 | YHR212W-A       |               | 568                | 121                  |
| S000004147 | YLR157C         | ASP3-2        | 4158               | 3244                 | S000001254 | YHR211W         | FLO5          | 568                | 121                  |
| S000004149 | YLR159W         |               | 3785               | 3244                 | S000001138 | YHR096C         | HXT5          | 605                | 119                  |
| S000028564 | YLR156C-A       |               | 3668               | 3244                 | S000007549 | YCL021W-A       |               | 310                | 117                  |
| S000004146 | YLR156W         |               | 3647               | 3244                 | S000000617 | YCR023C         |               | 312                | 109                  |
| S000028565 | YLR157C-C       |               | 7147               | 3228                 | S000028818 | YCR024C-B       |               | 312                | 109                  |
| S000028566 | YLR159C-A       |               | 3769               | 3228                 | S000000615 | YCR021C         | HSP30         | 312                | 109                  |
| S000004458 | YLR466W         | YRF1-4        | 6085               | 3061                 | S000006439 | YCR020W-B       | HTL1          | 312                | 109                  |
| S000004148 | YLR158C         | ASP3-3        | 6657               | 2738                 | S000000614 | YCR020C-A       | MAK31         | 312                | 109                  |
| S000002447 | YDR040C         | ENA1          | 3310               | 1986                 | S000000612 | YCR019W         | MAK32         | 312                | 109                  |
| S000001097 | YHR055C         | CUP1-2        | 1719               | 1719                 | S000000621 | YCR026C         | NPP1          | 312                | 109                  |
| S000002751 | YDR343C         | HXT6          | 1810               | 1715                 | S000000613 | YCR020C         | PET18         | 312                | 109                  |
| S000001098 | YHR056C         | RSC30         | 1069               | 1069                 | S000000619 | YCR024C-A       | PMP1          | 312                | 109                  |
| S000001096 | YHR054C         |               | 919                | 919                  | S000000622 | YCR027C         | RHB1          | 312                | 109                  |
| S000028562 | YLR154C-H       |               | 790                | 526                  | S000000618 | YCR024C         | SLM5          | 312                | 109                  |
| S000004151 | YLR161W         |               | 790                | 526                  | S000004246 | YLR256W         | HAP1          | 100                | 100                  |
| S000004145 | YLR155C         | ASP3-1        | 790                | 526                  | S000000297 | YBR093C         | PHO5          | 1391               | 98                   |
| S000004152 | YLR162W         |               | 613                | 513                  | S000003536 | YIL014C-A       |               | 85                 | 81                   |
| S000004780 | YMR170C         | ALD2          | 1469               | 342                  | S000001272 | YIL010W         | DOT5          | 85                 | 81                   |
| S000003990 | YLL067C         |               | 554                | 340                  | S000006432 | YIL009C-A       | EST3          | 85                 | 81                   |
| S000004459 | YLR467W         | YRF1-5        | 279                | 279                  | S000001276 | YIL014W         | MNT3          | 85                 | 81                   |
| S000001095 | YHR053C         | CUP1-1        | 269                | 269                  | S000001275 | YIL013C         | PDR11         | 85                 | 81                   |
| S000004456 | YLR464W         |               | 2349               | 261                  | S000001273 | YIL011W         | TIR3          | 85                 | 81                   |
| S000004454 | YLR462W         |               | 1409               | 261                  | S000000862 | YER060W         | FCY21         | 269                | 78                   |

|            |           |        |     |    |            |           |       |     |    |
|------------|-----------|--------|-----|----|------------|-----------|-------|-----|----|
| S000001136 | YHR094C   | HXT1   | 614 | 62 | S000003817 | YJR056C   |       | 81  | 20 |
| S000006325 | YPR121W   | THI22  | 403 | 60 | S000000273 | YBR069C   | TAT1  | 68  | 20 |
| S000004610 | YMR008C   | PLB1   | 192 | 50 | S000001383 | YIL121W   | QDR2  | 67  | 20 |
| S000002750 | YDR342C   | HXT7   | 86  | 44 | S000028829 | YHL048C-A |       | 46  | 19 |
| S000000079 | YAR033W   | MST28  | 67  | 42 | S000001040 | YHL048W   | COS8  | 46  | 19 |
| S000000084 | YAR050W   | FLO1   | 568 | 38 | S000028580 | YOL164W-A |       | 45  | 19 |
| S000000075 | YAR027W   | UIP3   | 183 | 37 | S000005523 | YOL163W   |       | 45  | 19 |
| S000001256 | YHR213W   |        | 131 | 34 | S000005522 | YOL162W   |       | 45  | 19 |
| S000003375 | YGR143W   | SKN1   | 102 | 34 | S000007627 | YOL159C-A |       | 45  | 19 |
| S000005086 | YNL142W   | MEP2   | 34  | 34 | S000005519 | YOL159C   |       | 45  | 19 |
| S000001696 | YKL213C   | DOA1   | 31  | 31 | S000005524 | YOL164W   | BDS1  | 45  | 19 |
| S000001698 | YKL215C   | OXF1   | 31  | 31 | S000005521 | YOL161C   | PAU20 | 45  | 19 |
| S000001695 | YKL212W   | SAC1   | 31  | 31 | S000001039 | YHL047C   | ARN2  | 32  | 19 |
| S000001697 | YKL214C   | YRA2   | 31  | 31 | S000003357 | YGR125W   |       | 30  | 19 |
| S000003021 | YGL053W   | PRM8   | 183 | 30 | S000003358 | YGR126W   |       | 30  | 19 |
| S000001261 | YHR218W   |        | 133 | 29 | S000004294 | YLR303W   | MET17 | 93  | 18 |
| S000001262 | YHR219W   |        | 133 | 29 | S000003019 | YGL051W   | MST27 | 44  | 18 |
| S000001392 | YIL130W   | ASG1   | 49  | 29 | S000028525 | YLR307C-A |       | 190 | 17 |
| S000001646 | YKL163W   | PIR3   | 73  | 28 | S000004298 | YLR307W   | CDA1  | 190 | 17 |
| S000001747 | YKR039W   | GAP1   | 219 | 27 | S000005755 | YOR229W   | WTM2  | 71  | 17 |
| S000005871 | YOR344C   | TYE7   | 69  | 26 | S000002400 | YDL241W   |       | 32  | 17 |
| S000000609 | YCR016W   |        | 151 | 25 | S000002398 | YDL239C   | ADY3  | 32  | 17 |
| S000000610 | YCR017C   | CWH43  | 151 | 25 | S000002396 | YDL237W   | AIM6  | 32  | 17 |
| S000000611 | YCR018C   | SRD1   | 151 | 25 | S000002397 | YDL238C   | GUD1  | 32  | 17 |
| S000003816 | YJR055W   | HIT1   | 100 | 25 | S000002399 | YDL240W   | LRG1  | 32  | 17 |
| S000002195 | YDL037C   | BSC1   | 34  | 25 | S000002395 | YDL236W   | PHO13 | 32  | 17 |
| S000003171 | YGL203C   | KEX1   | 139 | 24 | S000000076 | YAR028W   |       | 120 | 16 |
| S000000081 | YAR042W   | SWH1   | 42  | 24 | S000000077 | YAR029W   |       | 120 | 16 |
| S000004344 | YLR352W   |        | 34  | 24 | S000000936 | YER134C   |       | 55  | 16 |
| S000004345 | YLR353W   | BUD8   | 34  | 24 | S000000217 | YBR013C   |       | 36  | 16 |
| S000004343 | YLR351C   | NIT3   | 34  | 24 | S000003876 | YJR115W   |       | 33  | 15 |
| S000004346 | YLR354C   | TAL1   | 34  | 24 | S000003877 | YJR116W   |       | 33  | 15 |
| S000001554 | YKL071W   |        | 83  | 23 | S000003965 | YLL042C   | ATG10 | 29  | 15 |
| S000001553 | YKL070W   |        | 83  | 23 | S000003966 | YLL043W   | FPS1  | 29  | 15 |
| S000001552 | YKL069W   |        | 83  | 23 | S000003964 | YLL041C   | SDH2  | 29  | 15 |
| S000028524 | YKL068W-A |        | 83  | 23 | S000003963 | YLL040C   | VPS13 | 29  | 15 |
| S000001551 | YKL068W   | NUP100 | 83  | 23 | S000003754 | YJL218W   |       | 145 | 14 |
| S000004003 | YLR013W   | GAT3   | 30  | 23 | S000003755 | YJL219W   | HXT9  | 145 | 14 |
| S000004602 | YML133C   |        | 34  | 22 | S000003752 | YJL216C   | IMA5  | 145 | 14 |
| S000003462 | YGR230W   | BNS1   | 33  | 22 | S000003753 | YJL217W   | REE1  | 145 | 14 |
| S000003464 | YGR232W   | NAS6   | 33  | 22 | S000001908 | YFR012W   |       | 43  | 14 |
| S000003463 | YGR231C   | PHB2   | 33  | 22 | S000007606 | YFR012W-A |       | 43  | 14 |
| S000003465 | YGR233C   | PHO81  | 33  | 22 | S000001912 | YFR016C   |       | 43  | 14 |
| S000003461 | YGR229C   | SMI1   | 33  | 22 | S000001913 | YFR017C   |       | 43  | 14 |
| S000000078 | YAR031W   | PRM9   | 138 | 21 | S000001914 | YFR018C   |       | 43  | 14 |
| S000006219 | YPR015C   |        | 100 | 21 | S000001907 | YFR011C   | AIM13 | 43  | 14 |
|            |           |        |     |    | S000001917 | YFR021W   | ATG18 | 43  | 14 |

|            |           |        |    |    |            |           |        |    |    |
|------------|-----------|--------|----|----|------------|-----------|--------|----|----|
| S000001910 | YFR014C   | CMK1   | 43 | 14 | S000004645 | YMR042W   | ARG80  | 42 | 11 |
| S000001915 | YFR019W   | FAB1   | 43 | 14 | S000001873 | YFL021W   | GAT1   | 35 | 11 |
| S000001905 | YFR009W   | GCN20  | 43 | 14 | S000003637 | YJL101C   | GSH1   | 35 | 11 |
| S000001911 | YFR015C   | GSY1   | 43 | 14 | S000001876 | YFL018C   | LPD1   | 35 | 11 |
| S000001921 | YFR025C   | HIS2   | 43 | 14 | S000003638 | YJL102W   | MEF2   | 35 | 11 |
| S000001909 | YFR013W   | IOC3   | 43 | 14 | S000001874 | YFL020C   | PAU5   | 35 | 11 |
| S000002968 | YFR024C-A | LSB3   | 43 | 14 | S000001120 | YHR078W   |        | 30 | 11 |
| S000001919 | YFR023W   | PES4   | 43 | 14 | S000001122 | YHR080C   |        | 30 | 11 |
| S000001918 | YFR022W   | ROG3   | 43 | 14 | S000001121 | YHR079C   | IRE1   | 30 | 11 |
| S000001906 | YFR010W   | UBP6   | 43 | 14 | S000004325 | YLR333C   | RPS25B | 30 | 11 |
| S000006207 | YPR003C   |        | 37 | 14 | S000001957 | YHR079C-A | SAE3   | 30 | 11 |
| S000006208 | YPR004C   | AIM45  | 37 | 14 | S000001897 | YFR001W   | LOC1   | 31 | 10 |
| S000006209 | YPR005C   | HAL1   | 37 | 14 | S000001246 | YHR203C   | RPS4B  | 31 | 10 |
| S000006210 | YPR006C   | ICL2   | 37 | 14 | S000000482 | YBR278W   | DPB3   | 29 | 10 |
| S000006211 | YPR007C   | REC8   | 37 | 14 | S000005657 | YOR131C   |        | 88 | 9  |
| S000028857 | YOR192C-C |        | 97 | 13 | S000005667 | YOR141C   | ARP8   | 88 | 9  |
| S000001904 | YFR008W   | FAR7   | 44 | 13 | S000005660 | YOR134W   | BAG7   | 88 | 9  |
| S000001922 | YFR026C   | ULI1   | 44 | 13 | S000005659 | YOR133W   | EFT1   | 88 | 9  |
| S000001903 | YFR007W   | YFH7   | 44 | 13 | S000005662 | YOR136W   | IDH2   | 88 | 9  |
| S000001036 | YHL044W   |        | 37 | 13 | S000005668 | YOR142W   | LSC1   | 88 | 9  |
| S000001034 | YHL042W   |        | 37 | 13 | S000005664 | YOR138C   | RUP1   | 88 | 9  |
| S000001032 | YHL040C   | ARN1   | 37 | 13 | S000005666 | YOR140W   | SFL1   | 88 | 9  |
| S000001035 | YHL043W   | ECM34  | 37 | 13 | S000005663 | YOR137C   | SIA1   | 88 | 9  |
| S000001038 | YHL046C   | PAU13  | 37 | 13 | S000005658 | YOR132W   | VPS17  | 88 | 9  |
| S000004705 | YMR099C   |        | 36 | 13 | S000004303 | YLR312C   |        | 29 | 9  |
| S000004708 | YMR102C   |        | 36 | 13 | S000004304 | YLR312W-A | MRPL15 | 29 | 9  |
| S000028692 | YMR105W-A |        | 36 | 13 | S000004305 | YLR313C   | SPH1   | 29 | 9  |
| S000004706 | YMR100W   | MUB1   | 36 | 13 | S000004111 | YLR121C   | YPS3   | 44 | 8  |
| S000004711 | YMR105C   | PGM2   | 36 | 13 | S000003183 | YGL215W   | CLG1   | 34 | 8  |
| S000004707 | YMR101C   | SRT1   | 36 | 13 | S000003190 | YGL222C   | EDC1   | 34 | 8  |
| S000004712 | YMR106C   | YKU80  | 36 | 13 | S000003188 | YGL220W   | FRA2   | 34 | 8  |
| S000004710 | YMR104C   | YPK2   | 36 | 13 | S000003184 | YGL216W   | KIP3   | 34 | 8  |
| S000000177 | YBL081W   |        | 34 | 13 | S000003187 | YGL219C   | MDM34  | 34 | 8  |
| S000000178 | YBL082C   | ALG3   | 34 | 13 | S000003189 | YGL221C   | NIF3   | 34 | 8  |
| S000000778 | YEL052W   | AFG1   | 33 | 13 | S000028573 | YML054C-A |        | 30 | 8  |
| S000000779 | YEL053C   | MAK10  | 33 | 13 | S000004517 | YML053C   |        | 30 | 8  |
| S000000780 | YEL054C   | RPL12A | 33 | 13 | S000004514 | YML050W   | AIM32  | 30 | 8  |
| S000000777 | YEL051W   | VMA8   | 33 | 13 | S000004521 | YML057W   | CMP2   | 30 | 8  |
| S000007524 | YMR122W-A |        | 31 | 13 | S000004518 | YML054C   | CYB2   | 30 | 8  |
| S000002253 | YDL095W   | PMT1   | 74 | 12 | S000004515 | YML051W   | GAL80  | 30 | 8  |
| S000113557 | YDL007C-A |        | 55 | 12 | S000007472 | YML058W-A | HUG1   | 30 | 8  |
| S000003094 | YGL126W   | SCS3   | 42 | 12 | S000004520 | YML056C   | IMD4   | 30 | 8  |
| S000003095 | YGL127C   | SOH1   | 42 | 12 | S000004513 | YML049C   | RSE1   | 30 | 8  |
| S000003694 | YJL158C   | CIS3   | 89 | 11 | S000004523 | YML058W   | SML1   | 30 | 8  |
| S000003695 | YJL159W   | HSP150 | 89 | 11 | S000004516 | YML052W   | SUR7   | 30 | 8  |
| S000003912 | YJR151C   | DAN4   | 68 | 11 | S000000589 | YCL026C-A | FRM2   | 30 | 7  |
| S000001956 | YKL096W-A | CWP2   | 58 | 11 |            |           |        |    |    |

## Supplementary References

1. Baudin A, Ozier-Kalogeropoulos O, Denouel A, Lacroute F, Cullin C (1993) A simple and efficient method for direct gene deletion in *Saccharomyces cerevisiae*. *Nucleic Acids Res.* 21: 3329-3330. doi:10.1093/nar/21.14.3329
2. Wach A, Brachat A, Alberti-Segui C, Rebischung C, Philippsen P (1997) Heterologous HIS3 marker and GFP reporter modules for PCR-targeting in *Saccharomyces cerevisiae*. *Yeast* 13: 1065-1075. doi:10.1002/(SICI)1097-0061(19970915)13:11<1065::AID-YEA159>3.0.CO;2-K
3. Gavin A, Aloy P, Grandi P, Krause R, Boesche M, et al. (2006) Proteome survey reveals modularity of the yeast cell machinery. *Nature* 440: 631-636. doi:10.1038/nature04532
4. Huh W, Falvo JV, Gerke LC, Carroll AS, Howson RW, et al. (2003) Global analysis of protein localization in budding yeast. *Nature* 425: 686-691. doi:10.1038/nature02026
5. Hayashi A, Ding D, Da-Qiao D, Tsutsumi C, Chikashige Y, et al. (2009) Localization of gene products using a chromosomally tagged GFP-fusion library in the fission yeast *Schizosaccharomyces pombe*. *Genes Cells* 14: 217-225. doi:10.1111/j.1365-2443.2008.01264.x
6. Ghaemmaghami S, Huh W, Bower K, Howson RW, Belle A, et al. (2003) Global analysis of protein expression in yeast. *Nature* 425: 737-741. doi:10.1038/nature02046
7. Lind K, Norbeck J (2009) A QPCR-based reporter system to study post-transcriptional regulation via the 3' untranslated region of mRNA in *Saccharomyces cerevisiae*. *Yeast* 26: 407-413. doi:10.1002/yea.1675
8. Neil H, Malabat C, d'Aubenton-Carafa Y, Xu Z, Steinmetz LM, et al. (2009) Widespread bidirectional promoters are the major source of cryptic transcripts in yeast. *Nature* 457: 1038-1042. doi:10.1038/nature07747
9. Xu Z, Wei W, Gagneur J, Perocchi F, Clauder-Münster S, et al. (2009) Bidirectional promoters generate pervasive transcription in yeast. *Nature* 457: 1033-1037. doi:10.1038/nature07728
10. Xu Z, Wei W, Gagneur J, Clauder-Münster S, Smolik M, et al. (2011) Antisense expression increases gene expression variability and locus interdependency. *Mol. Syst. Biol.* 7: 468. doi:10.1038/msb.2011.1
11. Sauer B (1987) Functional expression of the cre-lox site-specific recombination system in the yeast *Saccharomyces cerevisiae*. *Mol. Cell. Biol.* 7: 2087-2096.
12. Gauss R, Trautwein M, Sommer T, Spang A (2005) New modules for the repeated internal and N-terminal epitope tagging of genes in *Saccharomyces cerevisiae*. *Yeast* 22: 1-12. doi:10.1002/yea.1187
13. Storici F, Resnick MA (2006) The delitto perfetto approach to in vivo site-directed mutagenesis and chromosome rearrangements with synthetic oligonucleotides in yeast. *Meth. Enzymol.* 409: 329-345. doi:10.1016/S0076-6879(05)09019-1



14. Schneider BL, Seufert W, Steiner B, Yang QH, Futcher AB (1995) Use of polymerase chain reaction epitope tagging for protein tagging in *Saccharomyces cerevisiae*. *Yeast* 11: 1265-1274. doi:10.1002/yea.320111306
15. Wach A, Brachat A, Pöhlmann R, Philippsen P (1994) New heterologous modules for classical or PCR-based gene disruptions in *Saccharomyces cerevisiae*. *Yeast* 10: 1793-1808.
16. Taxis C, Knop M (2006) System of centromeric, episomal, and integrative vectors based on drug resistance markers for *Saccharomyces cerevisiae*. *Biotechniques* 40: 73-78. doi:10.2144/000112040
17. Tong AHY, Boone C (2007) High-throughput strain construction and systematic synthetic lethal screening in *Saccharomyces cerevisiae*. *Meth. Microbiol.* 36: 369-386, 707-707. doi:10.1016/S0580-9517(06)36016-3
